# Supplementary material for: Comparative efficacy of medicaments or techniques for pulpotomy of primary molars: a network meta-analysis
Source: PubMed Central journal article supplement (PMC9876877; doi:10.1007/s00784-022-04830-1), 2022-12-29
Supplement: 784_2022_4830_MOESM1_ESM.pdf [file 784_2022_4830_MOESM1_ESM.pdf]

**Clinical Oral Investigations**

**Comparative efficacy of medicaments or techniques for pulpotomy of primary molars: a network meta-analysis**

**Running title: network meta-analysis of pulpotomy medicaments or techniques**

Jiehua Guo<sup>1,\*</sup>, Na Zhang<sup>1</sup>, Yuzhao Cheng<sup>1</sup>

<sup>1</sup>Department of oral medicine, Shanxi Provincial People's Hospital, Taiyuan, Shanxi, China

**\*Corresponding author**

Jiehua Guo

Department of oral medicine, Shanxi Provincial People's Hospital, NO.29 The twin towers temple District, Taiyuan, Shanxi, China

Email: dentist0355@163.com

**Table S1.** Detailed search strategies of target databases.**PubMed**

| No. | Search Details                                                                                                                                                                                                                                                                                                                                                                                                                                                                                                                                                                                                                                                                                                                                                                                                                                                                                                                                                                                                                                                                                                                                   | Results   |
|-----|--------------------------------------------------------------------------------------------------------------------------------------------------------------------------------------------------------------------------------------------------------------------------------------------------------------------------------------------------------------------------------------------------------------------------------------------------------------------------------------------------------------------------------------------------------------------------------------------------------------------------------------------------------------------------------------------------------------------------------------------------------------------------------------------------------------------------------------------------------------------------------------------------------------------------------------------------------------------------------------------------------------------------------------------------------------------------------------------------------------------------------------------------|-----------|
| 20  | ("Pulpotomy"[MeSH Terms] OR ("Pulpotomy"[Title/Abstract] OR "Pulpotomies"[Title/Abstract] OR "dental drilling"[Title/Abstract])) AND ("ferric sulfate"[Supplementary Concept] OR ("ferric sulfate"[Title/Abstract] OR "polyferric sulfate"[Title/Abstract]) OR ("formocresol"[Supplementary Concept] OR ("formocresol"[Title/Abstract] OR "formaldehyde cresol"[Title/Abstract])) OR ("Sodium Hypochlorite"[MeSH Terms] OR ("Sodium Hypochlorite"[Title/Abstract] OR "Antiformin"[Title/Abstract] OR "Clorox"[Title/Abstract])) OR ("Calcium Hydroxide"[MeSH Terms] OR "Calcium Hydroxide"[Title/Abstract]) OR ("MTA"[Title/Abstract] OR (("methods"[MeSH Subheading] OR "methods"[All Fields] OR "mt"[All Fields]) AND "aggregate"[Title/Abstract]) OR "aggregate proroot"[Title/Abstract])) AND ("random*" [All Fields] OR (("allocate"[All Fields] OR "allocated"[All Fields] OR "allocates"[All Fields] OR "allocating"[All Fields] OR "allocation"[All Fields] OR "allocational"[All Fields] OR "allocations"[All Fields] OR "allocative"[All Fields] OR "allocator"[All Fields] OR "allocators"[All Fields]) AND "conceal*" [All Fields])) | 267       |
| 19  | "ferric sulfate"[Supplementary Concept] OR ("ferric sulfate"[Title/Abstract] OR "polyferric sulfate"[Title/Abstract]) OR ("formocresol"[Supplementary Concept] OR ("formocresol"[Title/Abstract] OR "formaldehyde cresol"[Title/Abstract])) OR ("Sodium Hypochlorite"[MeSH Terms] OR ("Sodium Hypochlorite"[Title/Abstract] OR "Antiformin"[Title/Abstract] OR "Clorox"[Title/Abstract])) OR ("Calcium Hydroxide"[MeSH Terms] OR "Calcium Hydroxide"[Title/Abstract]) OR ("MTA"[Title/Abstract] OR (("methods"[MeSH Subheading] OR "methods"[All Fields] OR "mt"[All Fields]) AND "aggregate"[Title/Abstract]) OR "aggregate proroot"[Title/Abstract])                                                                                                                                                                                                                                                                                                                                                                                                                                                                                           | 86,702    |
| 18  | "random*" [All Fields] OR (("allocate"[All Fields] OR "allocated"[All Fields] OR "allocates"[All Fields] OR "allocating"[All Fields] OR "allocation"[All Fields] OR "allocational"[All Fields] OR "allocations"[All Fields] OR "allocative"[All Fields] OR "allocator"[All Fields] OR "allocators"[All Fields]) AND "conceal*" [All Fields])                                                                                                                                                                                                                                                                                                                                                                                                                                                                                                                                                                                                                                                                                                                                                                                                     | 1,556,941 |
| 17  | "MTA"[Title/Abstract] OR (("methods"[MeSH Subheading] OR "methods"[All Fields] OR "mt"[All Fields]) AND                                                                                                                                                                                                                                                                                                                                                                                                                                                                                                                                                                                                                                                                                                                                                                                                                                                                                                                                                                                                                                          | 20,934    |

|    |                                                                                                                                        |       |
|----|----------------------------------------------------------------------------------------------------------------------------------------|-------|
|    | "aggregate"[Title/Abstract]) OR "aggregate proroot"[Title/Abstract]                                                                    |       |
| 16 | "mineral trioxide aggregate"[Supplementary Concept]                                                                                    | 1,859 |
| 15 | "Calcium Hydroxide"[MeSH Terms] OR "Calcium Hydroxide"[Title/Abstract]                                                                 | 6,252 |
| 14 | "calcium hydroxide"[Title/Abstract]                                                                                                    | 4,315 |
| 13 | "Calcium Hydroxide"[MeSH Terms]                                                                                                        | 4,507 |
| 12 | "Sodium Hypochlorite"[MeSH Terms] OR "Sodium Hypochlorite"[Title/Abstract] OR "Antiformin"[Title/Abstract] OR "Clorox"[Title/Abstract] | 8,629 |
| 11 | "sodium hypochlorite"[Title/Abstract] OR "Antiformin"[Title/Abstract] OR "Clorox"[Title/Abstract]                                      | 6,561 |
| 10 | "Sodium Hypochlorite"[MeSH Terms]                                                                                                      | 5,081 |
| 9  | "formocresol"[Supplementary Concept] OR "formocresol"[Title/Abstract] OR "formaldehyde cresol"[Title/Abstract]                         | 595   |
| 8  | "formocresol"[Title/Abstract] OR "formaldehyde cresol"[Title/Abstract]                                                                 | 560   |
| 7  | "formocresol"[Supplementary Concept]                                                                                                   | 271   |
| 6  | "ferric sulfate"[Supplementary Concept] OR "ferric sulfate"[Title/Abstract] OR "polyferric sulfate"[Title/Abstract]                    | 626   |
| 5  | "ferric sulfate"[Title/Abstract] OR "polyferric sulfate"[Title/Abstract]                                                               | 362   |
| 4  | "ferric sulfate"[Supplementary Concept]                                                                                                | 411   |
| 3  | "Pulpotomy"[MeSH Terms] OR "Pulpotomy"[Title/Abstract] OR "Pulpotomies"[Title/Abstract] OR "dental drilling"[Title/Abstract]           | 2,084 |
| 2  | "Pulpotomy"[Title/Abstract] OR "Pulpotomies"[Title/Abstract] OR "dental drilling"[Title/Abstract]                                      | 1,402 |
| 1  | "Pulpotomy"[MeSH Terms]                                                                                                                | 1,662 |

### Embase

| #No | Query                                                                                                            | Results |
|-----|------------------------------------------------------------------------------------------------------------------|---------|
| #22 | #21 AND [embase]/lim                                                                                             | 53      |
| #21 | #3 AND #19 AND #20                                                                                               | 222     |
| #20 | random*:ti,ab,kw OR allocation:ti,ab,kw                                                                          | 1843475 |
| #19 | #6 OR #9 OR #12 OR #15 OR #18                                                                                    | 273028  |
| #18 | #16 OR #17                                                                                                       | 5978    |
| #17 | 'mineral trioxide aggregate'/exp                                                                                 | 1902    |
| #16 | 'mineral trioxide aggregate':ti,ab,kw OR 'mt aggregate':ti,ab,kw OR mta:ti,ab,kw OR 'aggregate proroot':ti,ab,kw | 5849    |
| #15 | #13 OR #14                                                                                                       | 6942    |

|     |                                                                                |       |
|-----|--------------------------------------------------------------------------------|-------|
| #14 | 'calcium hydroxide'/exp                                                        | 6013  |
| #13 | 'calcium hydroxide':ti,ab,kw                                                   | 4242  |
| #12 | #10 OR #11                                                                     | 10898 |
| #11 | 'hypochlorite sodium'/exp                                                      | 9284  |
| #10 | 'sodium hypochlorite':ti,ab,kw OR antiformin:ti,ab,kw OR clorox:ti,ab,kw       | 6670  |
| #9  | #7 OR #8                                                                       | 682   |
| #8  | 'formocresol'/exp                                                              | 574   |
| #7  | formocresol:ti,ab,kw OR formacresol:ti,ab,kw OR 'formaldehyde cresol':ti,ab,kw | 553   |
| #6  | #4 OR #5                                                                       | 864   |
| #5  | 'ferric sulfate'/exp                                                           | 722   |
| #4  | 'ferric sulfate':ti,ab,kw OR 'polyferric sulfate':ti,ab,kw                     | 415   |
| #3  | #1 OR #2                                                                       | 1443  |
| #2  | 'pulpotomy'/exp                                                                | 493   |
| #1  | pulpotomy:ti,ab,kw OR pulpotomies:ti,ab,kw OR 'dental drilling':ti,ab,kw       | 1362  |

#### Cochrane Central Registry of Controlled Trials (CENTRAL)

| #No | Search                                                                                                             | Hits        |
|-----|--------------------------------------------------------------------------------------------------------------------|-------------|
| #1  | (Pulpotomy):ti,ab,kw OR (Pulpotomies):ti,ab,kw OR (dental drilling):ti,ab,kw                                       | 740         |
| #2  | MeSH descriptor: [Pulpotomy] explode all trees                                                                     | 183         |
| #3  | #1 or #2                                                                                                           | 740         |
| #4  | (ferric sulfate):ti,ab,kw OR (polyferric sulfate):ti,ab,kw                                                         | 300         |
| #5  | (formocresol):ti,ab,kw OR (Formaldehyde cresol):ti,ab,kw                                                           | 163         |
| #6  | (Sodium Hypochlorit):ti,ab,kw OR (Antiformin):ti,ab,kw OR (Clorox):ti,ab,kw                                        | 9           |
| #7  | MeSH descriptor: [Sodium Hypochlorite] explode all trees                                                           | 481         |
| #8  | #6 or #7                                                                                                           | 486         |
| #9  | (Calcium Hydroxide):ti,ab,kw                                                                                       | 869         |
| #10 | MeSH descriptor: [Saline Solution] explode all trees                                                               | 150         |
| #11 | #9 or #10                                                                                                          | 1018        |
| #12 | (mineral trioxide aggregate):ti,ab,kw OR (MTA):ti,ab,kw OR (MT aggregate):ti,ab,kw OR (aggregate ProRoot):ti,ab,kw | 842         |
| #13 | #4 or #5 or #8 or #11 or #12                                                                                       | 25483       |
| #14 | (random*):ti,ab,kw OR (allocation):ti,ab,kw                                                                        | 113120<br>9 |
| #15 | #3 and #13 and #14 in Trials                                                                                       | 240         |

**Table S2. Local consistency model test between different pulpotomy medicaments**

Local consistency model test was evaluated by using node-splitting method, and a P of >0.05 suggested that local consistency assumption was established. For all outcomes, A, B, C, D, E, F, and G represents formocresol, ferric sulphate, sodium hypochlorite, calcium hydroxide, mineral trioxide aggregate, biodentine, and laser, respectively.

**(1) Local inconsistency evaluation for clinical success rate at 6 months.**

| . network sidesplit all, tau |           |           |           |           |            |           |       |          |
|------------------------------|-----------|-----------|-----------|-----------|------------|-----------|-------|----------|
| Side                         | Direct    |           | Indirect  |           | Difference |           |       | tau      |
|                              | Coef.     | Std. Err. | Coef.     | Std. Err. | Coef.      | Std. Err. | P> z  |          |
| A B                          | -.1448938 | .4885681  | -.7227344 | .8846618  | .5778405   | 1.044539  | 0.580 | .2454361 |
| A C                          | -.0183985 | .6695121  | .2638611  | 1.089181  | -.2822596  | 1.305055  | 0.829 | .2974583 |
| A D                          | -2.137115 | .9880096  | -2.231494 | 1.420251  | .094379    | 1.7256    | 0.956 | .3061202 |
| A E                          | .3064395  | .3837214  | 1.045369  | .7474809  | -.7389292  | .8585123  | 0.389 | .1963843 |
| A F                          | 1.539784  | .923803   | .358435   | .6147251  | 1.181349   | 1.09704   | 0.282 | .1854211 |
| A G                          | -1.73e-09 | .8659389  | .439144   | .825372   | -.439144   | 1.196281  | 0.714 | .3261899 |
| B C                          | .816718   | .6746899  | -.4654708 | .8994649  | 1.282189   | 1.12579   | 0.255 | .1385903 |
| B D                          | -.1417319 | 2.050621  | -2.292883 | .9881062  | 2.151152   | 2.275986  | 0.345 | .2578133 |
| B E                          | 1.984713  | .9482562  | .2358832  | .5341494  | 1.748829   | 1.089549  | 0.108 | 1.28e-09 |
| B G                          | 1.820713  | 1.638037  | .2378627  | .7521797  | 1.58285    | 1.802476  | 0.380 | .2652432 |
| C E                          | .0983934  | 1.593933  | .4743716  | .7228101  | -.3759782  | 1.744001  | 0.829 | .3007057 |
| D E                          | 2.157971  | 1.241473  | 3.036317  | 1.125175  | -.8783465  | 1.677681  | 0.601 | .3213794 |
| E F                          | .1561771  | .4584218  | 1.210116  | 1.268077  | -1.053938  | 1.313019  | 0.422 | .2324784 |
| E G                          | -.0695622 | .9094762  | -.3978202 | .8275954  | .328258    | 1.229377  | 0.789 | .33568   |
| F G                          | -1.494279 | 1.38956   | -.0229183 | .9170031  | -1.471361  | 1.752566  | 0.401 | .2840517 |

**(2) Local inconsistency evaluation for clinical success rate at 12 months.**

| . network sidesplit all, tau |           |           |           |           |            |           |       |          |
|------------------------------|-----------|-----------|-----------|-----------|------------|-----------|-------|----------|
| Side                         | Direct    |           | Indirect  |           | Difference |           |       | tau      |
|                              | Coef.     | Std. Err. | Coef.     | Std. Err. | Coef.      | Std. Err. | P> z  |          |
| A B                          | -.0399655 | .4468024  | -.9529685 | .7738564  | .913003    | .9003061  | 0.311 | .4421111 |
| A C                          | -.2556346 | .605124   | .3072173  | .8927584  | -.5628519  | 1.09552   | 0.607 | .511837  |
| A D                          | -1.983862 | .7395351  | -2.576135 | 1.410545  | .5922733   | 1.581983  | 0.708 | .5093049 |
| A E                          | .4850446  | .4183065  | 1.227591  | .8189307  | -.742546   | .9396481  | 0.429 | .4420701 |
| A F                          | 1.774631  | 1.222414  | .2987236  | .5793112  | 1.475908   | 1.352262  | 0.275 | .4579616 |
| A G                          | .1566276  | .6897223  | 1.61303   | 1.740368  | -1.456403  | 1.872089  | 0.437 | .5032362 |
| B C                          | .3099784  | .5789222  | -.1057937 | .9666847  | .415772    | 1.117944  | 0.710 | .5085817 |
| B D                          | -.4560559 | 1.662982  | -2.233605 | .8410855  | 1.777549   | 1.914949  | 0.353 | .4742363 |
| B E                          | 1.341878  | .7173711  | .5530696  | .6822877  | .7888085   | 1.007149  | 0.434 | .4270769 |
| B G                          | 1.820718  | 1.692944  | .3643106  | .7991635  | 1.456407   | 1.872082  | 0.437 | .503237  |
| C E                          | 1.27428   | .8639416  | .3135455  | .7473522  | .9607349   | 1.165363  | 0.410 | .4595949 |
| D E                          | 2.098725  | 1.16089   | 3.178453  | .917214   | -1.079728  | 1.517943  | 0.477 | .5138982 |
| E F                          | -.1580392 | .4454506  | 1.281838  | 1.67869   | -1.439877  | 1.72896   | 0.405 | .4695067 |

**(3) Local inconsistency evaluation for radiographic success rate at 6 months.**

```
. network sidesplit all, tau
```

| Side | Direct    |           | Indirect  |           | Difference |           |       | tau      |
|------|-----------|-----------|-----------|-----------|------------|-----------|-------|----------|
|      | Coef.     | Std. Err. | Coef.     | Std. Err. | Coef.      | Std. Err. | P> z  |          |
| A B  | .0298195  | .33974    | -1.229361 | .6763617  | 1.25918    | .7694598  | 0.102 | 9.73e-09 |
| A C  | -.5837717 | .4075917  | 1.469841  | .7452409  | -2.053613  | .8806904  | 0.020 | 2.02e-10 |
| A D  | -2.759601 | .9497164  | -2.014636 | 1.374156  | -.7449651  | 1.670409  | 0.656 | .0000433 |
| A E  | 1.008124  | .2896357  | 1.291833  | .6778619  | -.2837093  | .7481442  | 0.705 | .1091777 |
| A F  | 1.460964  | .7232467  | .4671467  | .4020001  | .9938168   | .8272104  | 0.230 | .0001439 |
| A G  | .0743807  | .64381    | .7998022  | .7771782  | -.7254215  | 1.009206  | 0.472 | .0000555 |
| B C  | .5630904  | .4530226  | -.4949388 | .5824127  | 1.058029   | .7392393  | 0.152 | 8.94e-10 |
| B D  | -.142912  | 2.03435   | -2.705304 | .9043443  | 2.562392   | 2.225989  | 0.250 | 9.33e-09 |
| B E  | 1.895256  | .8906283  | 1.162384  | .417546   | .7328723   | .9766618  | 0.453 | 1.19e-06 |
| B G  | 1.820723  | 1.616419  | .4389014  | .5988199  | 1.381821   | 1.723769  | 0.423 | 1.18e-08 |
| C E  | 1.376     | 1.235283  | 1.100716  | .4676795  | .2752844   | 1.309549  | 0.834 | .1338581 |
| D E  | 2.492567  | 1.219854  | 4.371361  | 1.047712  | -1.878794  | 1.607819  | 0.243 | .0000611 |
| E F  | -.391641  | .2831571  | .3471818  | 1.079906  | -.7388228  | 1.101868  | 0.503 | .1371679 |
| E G  | -.0716263 | .9027808  | -.9855841 | .6314818  | .9139578   | 1.101361  | 0.407 | 5.46e-08 |
| F G  | -.8848115 | 1.177833  | -.1211073 | .6976137  | -.7637043  | 1.424977  | 0.592 | .1327275 |

(4) Local inconsistency evaluation for radiographic success rate at 12 months.

```
. network sidesplit all, tau
```

| Side | Direct    |           | Indirect  |           | Difference |           |       | tau      |
|------|-----------|-----------|-----------|-----------|------------|-----------|-------|----------|
|      | Coef.     | Std. Err. | Coef.     | Std. Err. | Coef.      | Std. Err. | P> z  |          |
| A B  | .0947586  | .3403871  | -.5399608 | .5166715  | .6347195   | .6182941  | 0.305 | 9.52e-08 |
| A C  | -.6975753 | .4016688  | .2544287  | .5404852  | -.952004   | .6874748  | 0.166 | 3.05e-07 |
| A D  | -2.127108 | .5744374  | -1.540983 | 1.133086  | -.586125   | 1.300207  | 0.652 | 2.11e-08 |
| A E  | .8928832  | .262613   | 1.459847  | .6677192  | -.5669637  | .7246615  | 0.434 | 3.44e-07 |
| A F  | 1.335864  | .8555848  | .7750499  | .3811924  | .5608141   | .9360369  | 0.549 | 3.95e-09 |
| A G  | .4666433  | .4645329  | 1.760544  | 1.64199   | -1.293901  | 1.706436  | 0.448 | 1.63e-09 |
| B C  | -.1033611 | .3593907  | -.6759079 | .5978644  | .5725467   | .6996158  | 0.413 | 7.83e-09 |
| B D  | -.9447923 | 1.12753   | -2.287457 | .6830956  | 1.342664   | 1.374106  | 0.329 | 3.02e-10 |
| B E  | 1.074163  | .5892159  | 1.06804   | .421576   | .0061231   | .7154298  | 0.993 | 5.21e-08 |
| B G  | 1.820739  | 1.616419  | .5268073  | .5468818  | 1.293932   | 1.706423  | 0.448 | 1.03e-09 |
| C E  | 1.929328  | .7063027  | 1.088458  | .4418588  | .8408703   | .8359243  | 0.314 | 1.57e-08 |
| D E  | 1.826939  | .8127069  | 3.857     | .7106158  | -2.030061  | 1.100443  | 0.065 | 5.26e-09 |
| E F  | -.1542849 | .2808196  | .742836   | 1.276168  | -.8971209  | 1.319107  | 0.496 | 2.04e-06 |

**Table S3. Loop inconsistency test of first closed loop.**

Loop inconsistency was evaluated by using node-splitting method, and loop consistency assumption was established if 95% confidence interval (CI) contained zero. A, B, C, D, E, F, and G represents formocresol, ferric sulphate, sodium hypochlorite, calcium hydroxide, mineral trioxide aggregate, biodentine, and laser, respectively, respectively.

(1) Loop inconsistency evaluation for clinical success rate at 6 months.

| Loop  | IF    | seIF  | z_value | p_value | CI_95        | Loop_Heterog_tau2 |
|-------|-------|-------|---------|---------|--------------|-------------------|
| E-F-G | 2.179 | 1.830 | 1.191   | 0.234   | (0.00, 5.77) | 0.000             |
| A-B-D | 2.070 | 2.296 | 0.902   | 0.367   | (0.00, 6.57) | 0.000             |
| A-B-G | 1.870 | 1.875 | 0.998   | 0.318   | (0.00, 5.54) | 0.000             |
| A-E-F | 1.217 | 1.126 | 1.081   | 0.280   | (0.00, 3.42) | 0.000             |
| A-B-C | 1.214 | 1.062 | 1.143   | 0.253   | (0.00, 3.30) | 0.000             |
| A-B-E | 1.125 | 1.183 | 0.952   | 0.341   | (0.00, 3.44) | 0.000             |
| A-F-G | 0.728 | 2.012 | 0.362   | 0.717   | (0.00, 4.67) | 0.000             |
| A-C-E | 0.669 | 1.815 | 0.369   | 0.712   | (0.00, 4.23) | 0.000             |
| B-C-E | 0.582 | 2.168 | 0.268   | 0.788   | (0.00, 4.83) | 0.000             |
| B-E-G | 0.551 | 2.098 | 0.263   | 0.793   | (0.00, 4.66) | 0.000             |
| A-D-E | 0.250 | 1.583 | 0.158   | 0.874   | (0.00, 3.35) | 0.000             |
| B-D-E | 0.220 | 2.660 | 0.083   | 0.934   | (0.00, 5.43) | 0.000             |
| A-E-G | 0.183 | 1.230 | 0.149   | 0.882   | (0.00, 2.59) | 0.000             |

(2) Loop inconsistency evaluation for clinical success rate at 12 months.

| Loop  | IF    | seIF  | z_value | p_value | CI_95        | Loop_Heterog_tau2 |
|-------|-------|-------|---------|---------|--------------|-------------------|
| A-B-G | 1.602 | 1.763 | 0.909   | 0.364   | (0.00, 5.06) | 0.000             |
| A-E-F | 1.572 | 1.310 | 1.200   | 0.230   | (0.00, 4.14) | 0.000             |
| A-B-C | 1.132 | 0.883 | 1.282   | 0.200   | (0.00, 2.86) | 0.000             |
| A-B-E | 0.719 | 0.966 | 0.745   | 0.456   | (0.00, 2.61) | 0.253             |
| B-D-E | 0.421 | 2.143 | 0.197   | 0.844   | (0.00, 4.62) | 0.000             |
| B-C-E | 0.410 | 1.341 | 0.306   | 0.760   | (0.00, 3.04) | 0.000             |
| A-C-E | 0.404 | 1.174 | 0.344   | 0.731   | (0.00, 2.71) | 0.286             |
| A-B-D | 0.264 | 2.158 | 0.122   | 0.903   | (0.00, 4.49) | 0.727             |
| A-D-E | 0.049 | 1.621 | 0.030   | 0.976   | (0.00, 3.23) | 0.707             |

(3) Loop inconsistency evaluation for radiographic success rate at 6 months.

| Loop  | IF    | seIF  | z_value | p_value | CI_95        | Loop_Heterog_tau2 |
|-------|-------|-------|---------|---------|--------------|-------------------|
| A-B-D | 2.422 | 2.541 | 0.953   | 0.340   | (0.00, 7.40) | 0.424             |
| A-B-G | 1.784 | 1.798 | 0.992   | 0.321   | (0.00, 5.31) | 0.035             |
| E-F-G | 1.728 | 1.540 | 1.122   | 0.262   | (0.00, 4.75) | 0.000             |
| A-B-C | 1.364 | 0.871 | 1.566   | 0.117   | (0.00, 3.07) | 0.230             |
| A-D-E | 1.272 | 1.572 | 0.809   | 0.419   | (0.00, 4.35) | 0.000             |
| A-E-F | 1.037 | 0.880 | 1.178   | 0.239   | (0.00, 2.76) | 0.000             |
| B-C-E | 1.004 | 2.984 | 0.336   | 0.737   | (0.00, 6.85) | 2.917             |
| A-E-G | 0.839 | 1.145 | 0.733   | 0.464   | (0.00, 3.08) | 0.000             |
| A-C-E | 0.819 | 1.602 | 0.511   | 0.609   | (0.00, 3.96) | 0.000             |
| B-E-G | 0.498 | 2.287 | 0.218   | 0.828   | (0.00, 4.98) | 0.310             |
| A-B-E | 0.484 | 1.129 | 0.429   | 0.668   | (0.00, 2.70) | 0.000             |
| B-D-E | 0.409 | 2.659 | 0.154   | 0.878   | (0.00, 5.62) | 0.000             |
| A-F-G | 0.151 | 1.577 | 0.096   | 0.924   | (0.00, 3.24) | 0.000             |

(4) Loop inconsistency evaluation for radiographic success rate at 12 months.

| Loop  | IF    | seIF  | z_value | p_value | CI_95        | Loop_Heterog_tau2 |
|-------|-------|-------|---------|---------|--------------|-------------------|
| B-D-E | 1.603 | 1.607 | 0.998   | 0.318   | (0.00, 4.75) | 0.000             |
| A-B-G | 1.222 | 1.916 | 0.638   | 0.524   | (0.00, 4.98) | 0.359             |
| A-D-E | 1.136 | 1.176 | 0.966   | 0.334   | (0.00, 3.44) | 0.202             |
| A-B-C | 1.058 | 0.665 | 1.592   | 0.111   | (0.00, 2.36) | 0.000             |
| B-C-E | 0.812 | 1.079 | 0.753   | 0.452   | (0.00, 2.93) | 0.000             |
| A-E-F | 0.566 | 0.945 | 0.599   | 0.549   | (0.00, 2.42) | 0.000             |
| A-C-E | 0.191 | 0.897 | 0.212   | 0.832   | (0.00, 1.95) | 0.000             |
| A-B-E | 0.059 | 0.821 | 0.072   | 0.943   | (0.00, 1.67) | 0.131             |
| A-B-D | 0.016 | 1.807 | 0.009   | 0.993   | (0.00, 3.56) | 0.774             |
